# Supplementary material for: Transcriptomic analysis reveals metabolic switches and surface remodeling as key processes for stage transition in Trypanosoma cruzi
Source: PubMed Central journal article supplement (PMC5345387; doi:10.7717/peerj.3017), 2017-03-08

A

## amastigotes flagellum associated genes

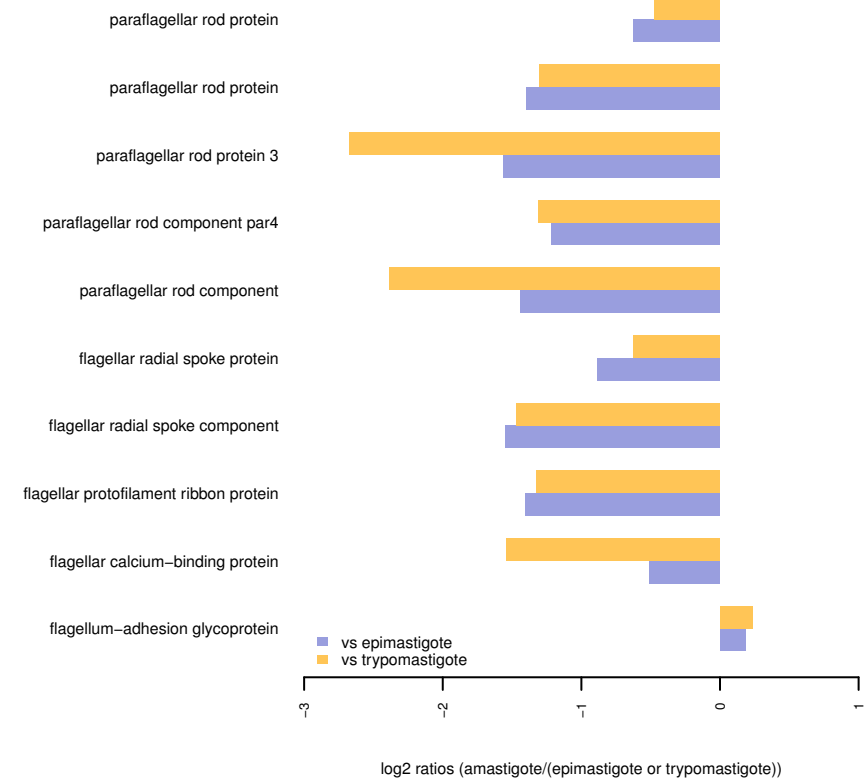

B

## epimastigotes histidine-to-glutamate

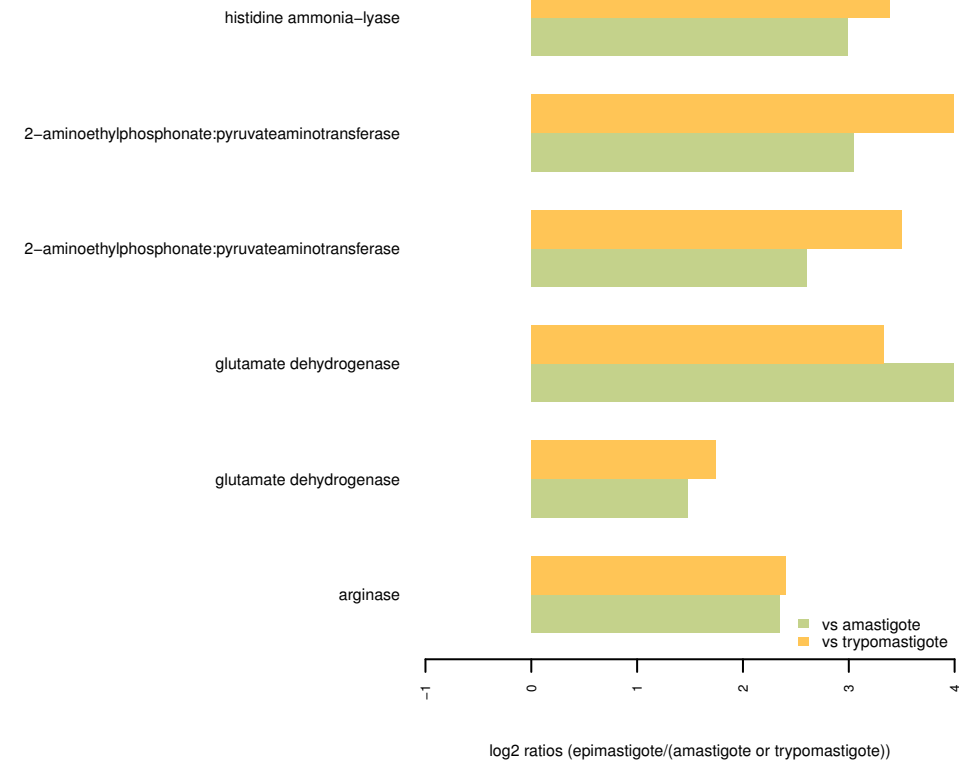

C

## trypomastigotes mucin genes

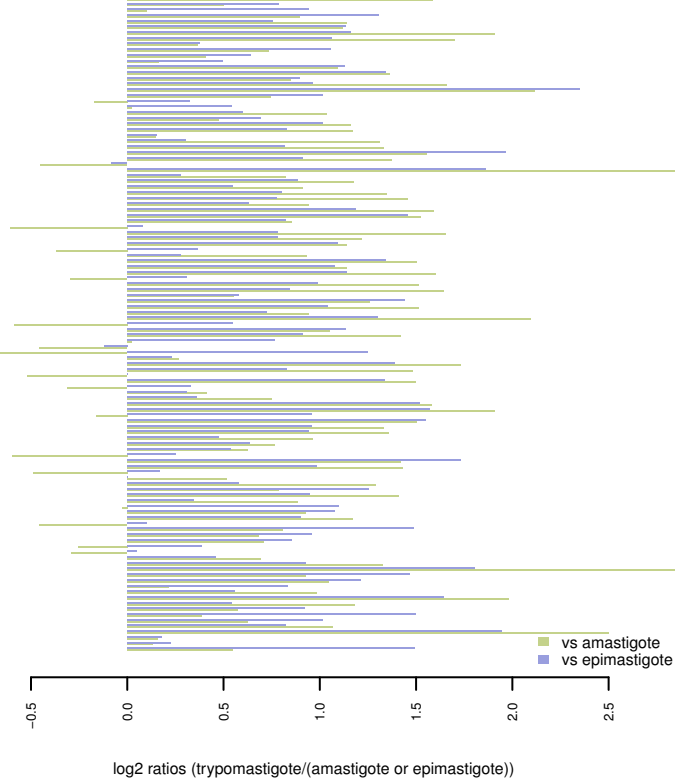

Supplement: peerj-05-3017-s013.pdf [file peerj-05-3017-s013.pdf]
